# Supplementary material for: Can endocranial volume be estimated accurately from external skull measurements in great-tailed grackles ( Quiscalus mexicanus )?
Source: PeerJ journal article supplement (doi:10.7717/peerj.1000), 2015-06-11
Supplement: OsiriXpic.pdf [file OsiriXpic.pdf]

Image size: 512 x 512  
View size: 924 x 620  
WL: -97 WW: 2792

A

626675 ( 3 m , 19 d )  
Brain+Head Wo  
ABD\_WO  
7

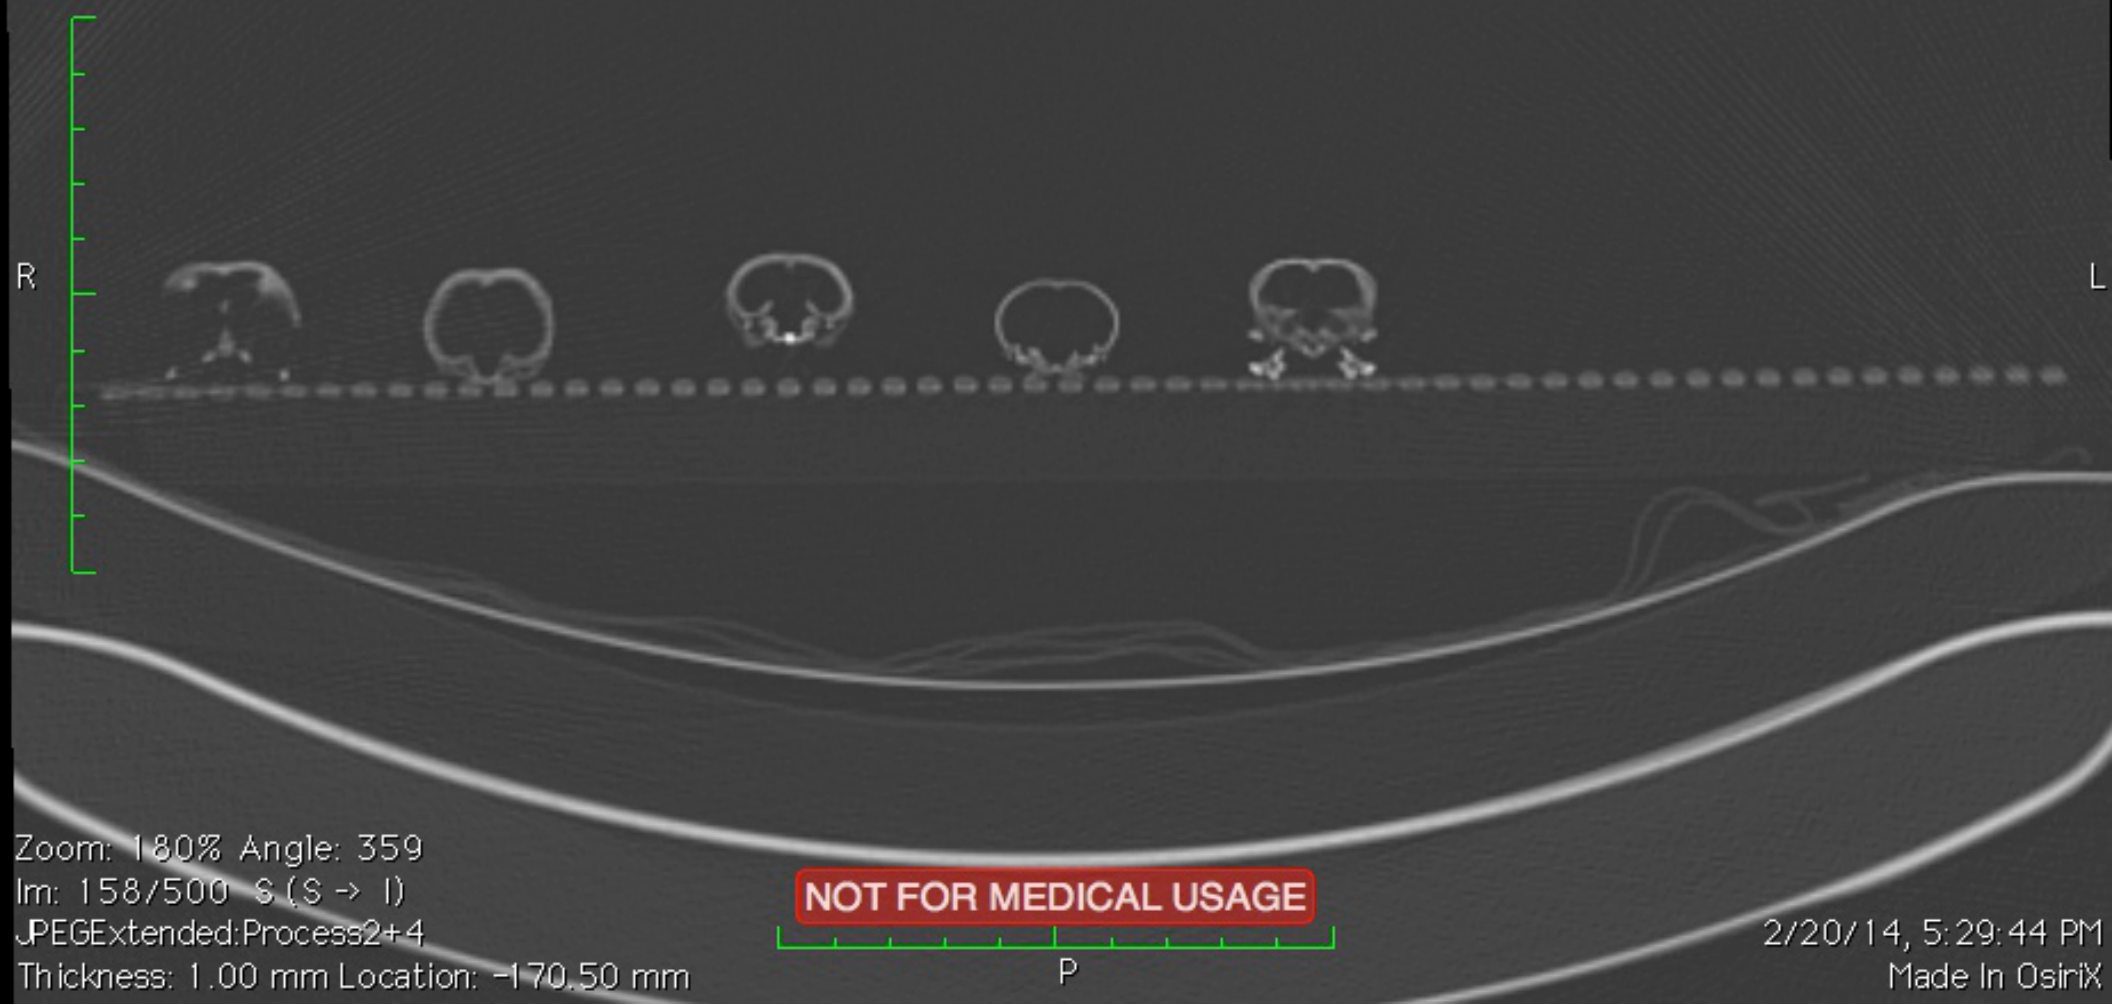

Zoom: 180% Angle: 359  
Im: 158/500 S (S → I)  
JPEGExtended:Process2+4  
Thickness: 1.00 mm Location: -170.50 mm

**NOT FOR MEDICAL USAGE**

2/20/14, 5:29:44 PM  
Made In OsiriX
